# Supplementary material for: A combinatorial DNA assembly approach to biosynthesis of N-linked glycans in E. coli
Source: PubMed Central journal article supplement (PMC9990991; doi:10.1093/glycob/cwac082), 2023-01-13

Figure S1

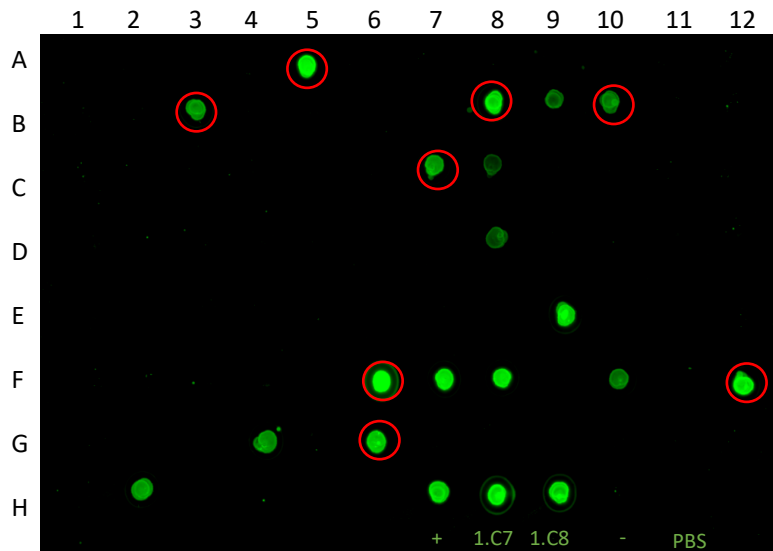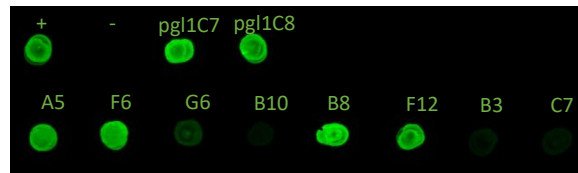

Figure S2

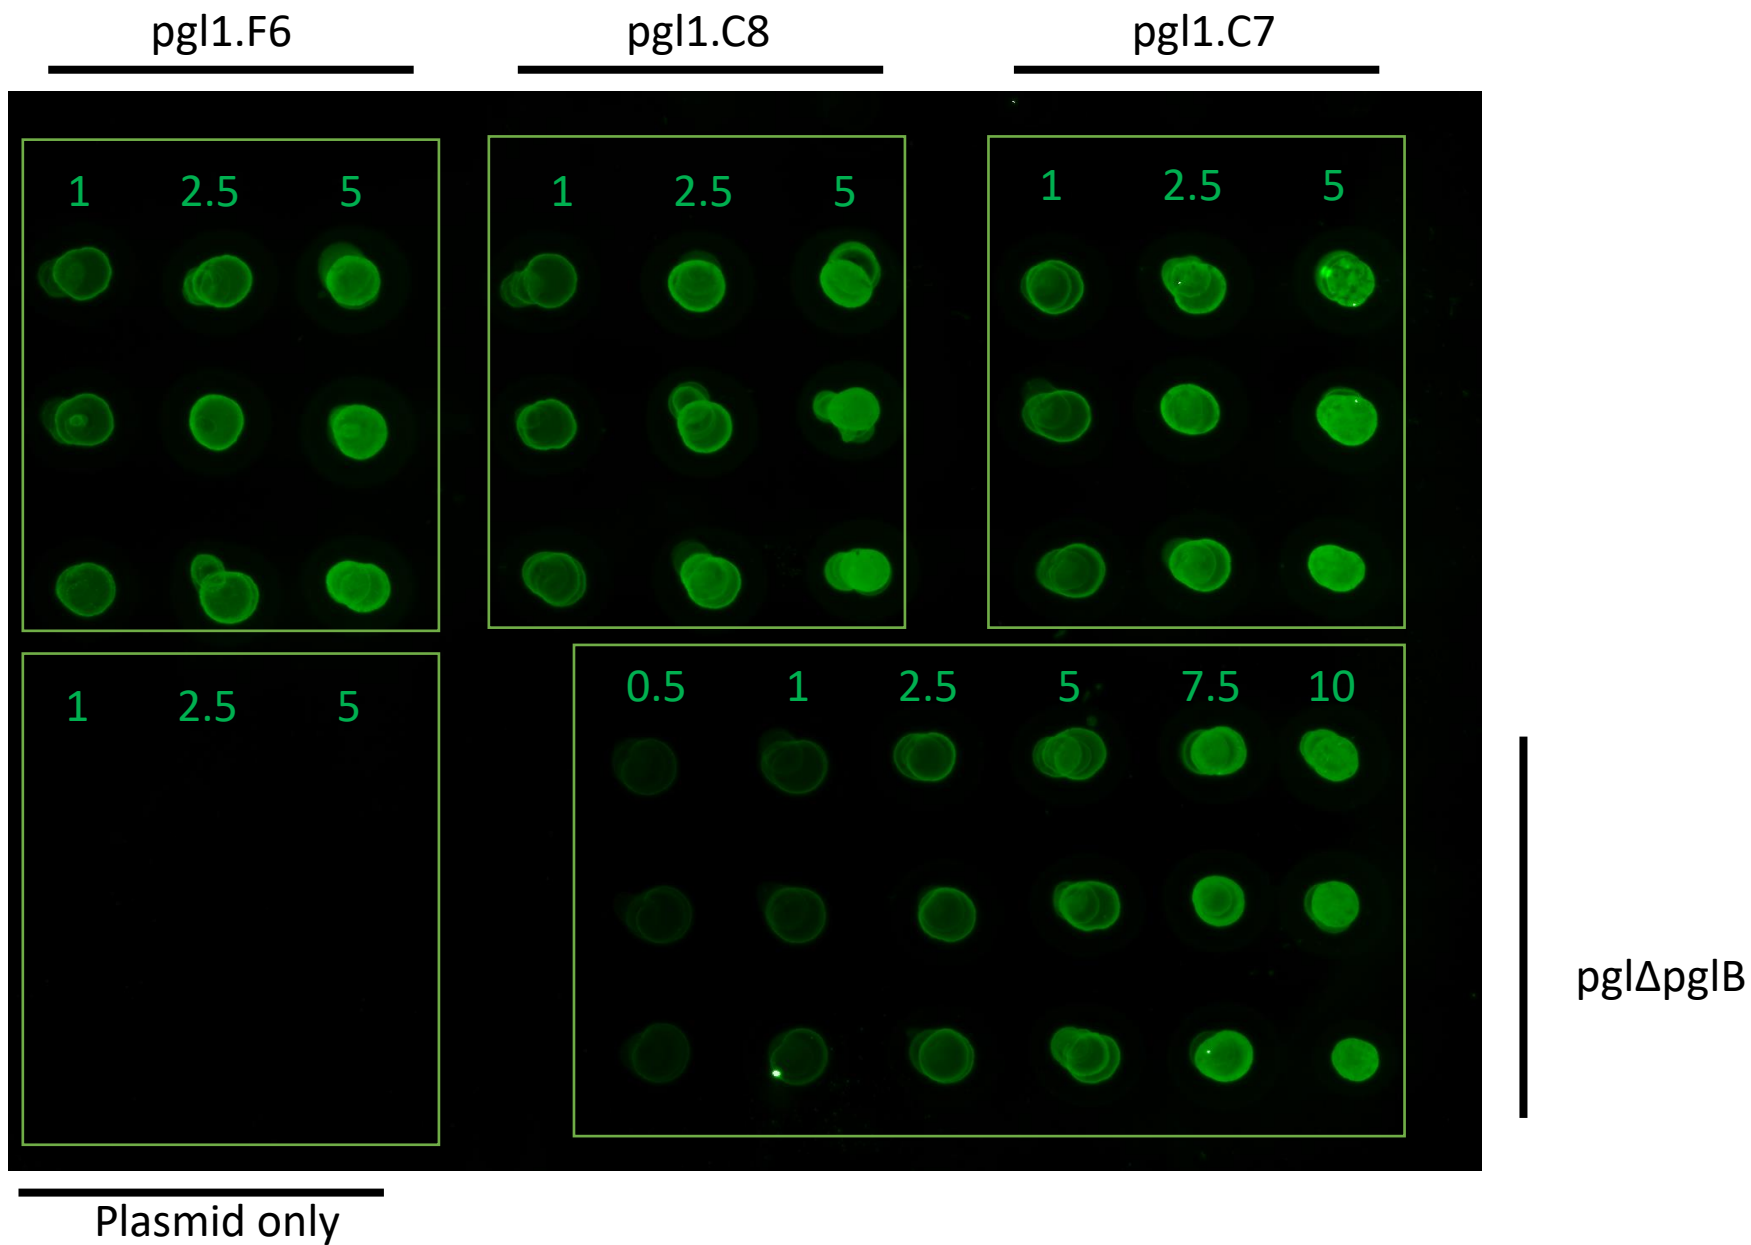

Figure S3

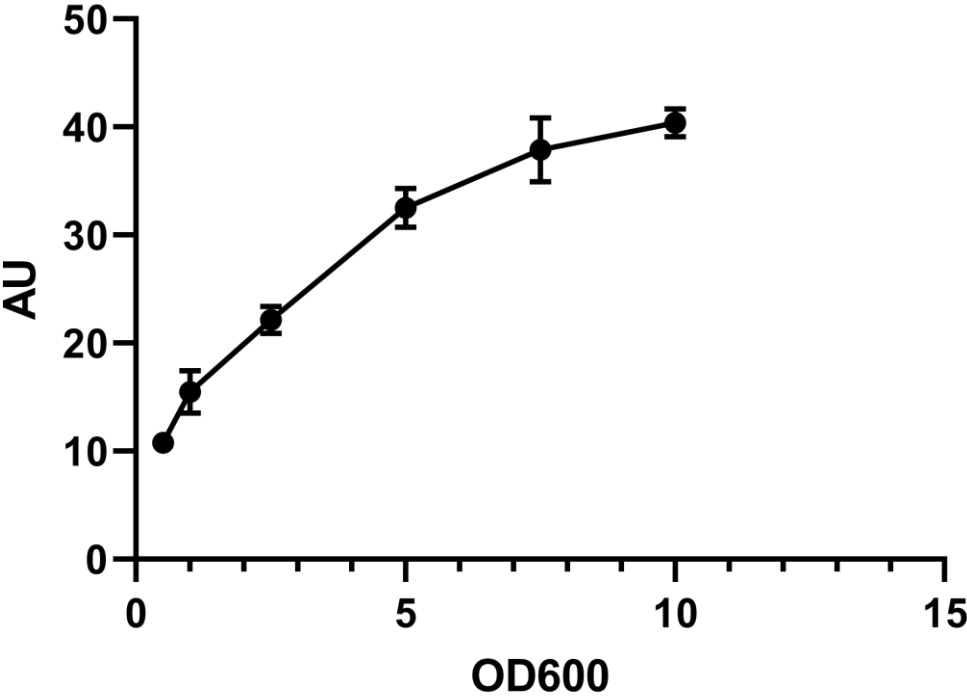

Figure S4

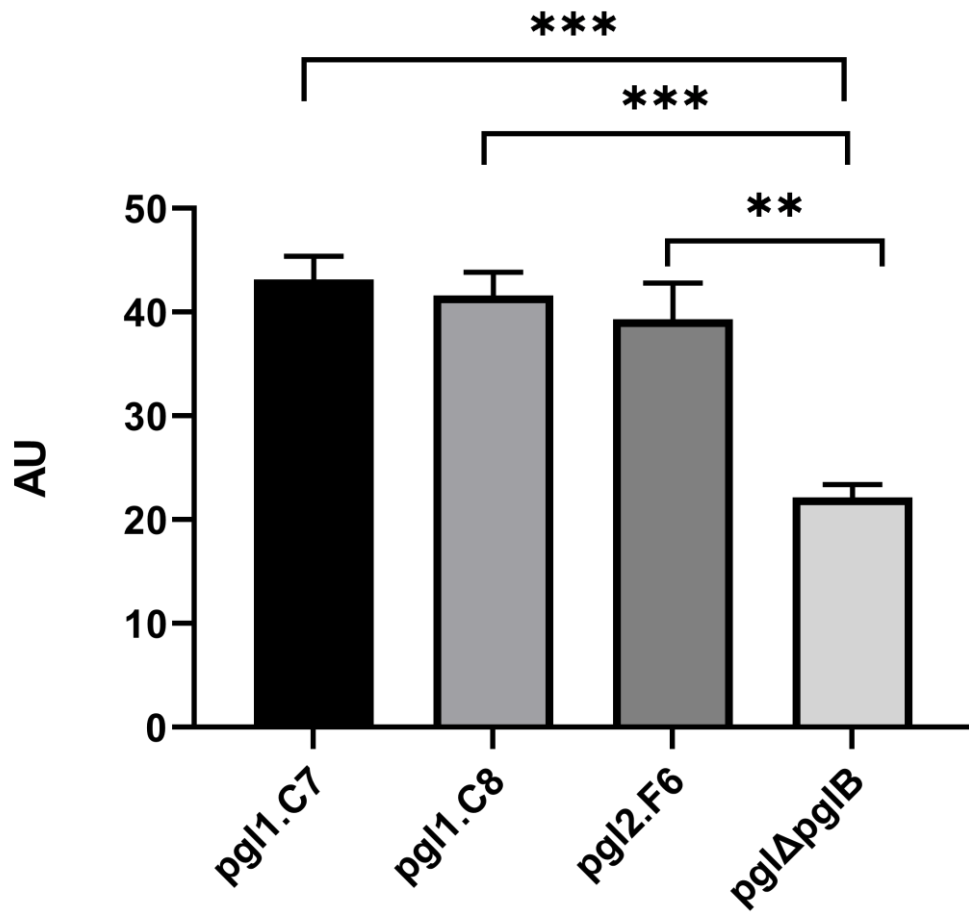

Figure S5

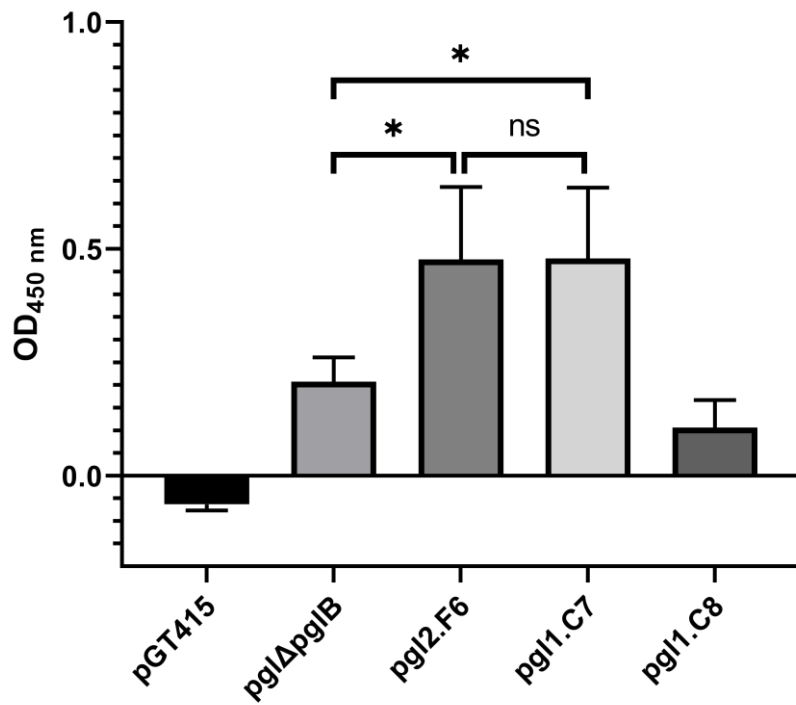

Figure S6

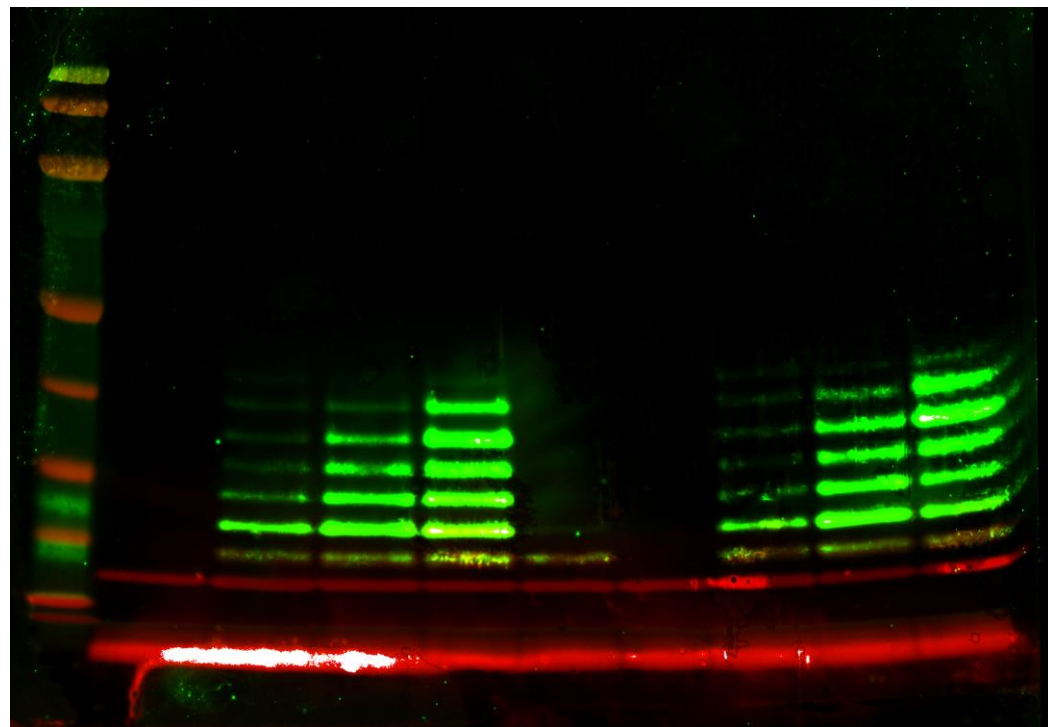

plasmid only  
pglΔpglB  
pgl2.F6  
pgl1.C7  
pgl1.C8  
plasmid only  
pglΔpglB  
pgl2.F6  
pgl1.C7

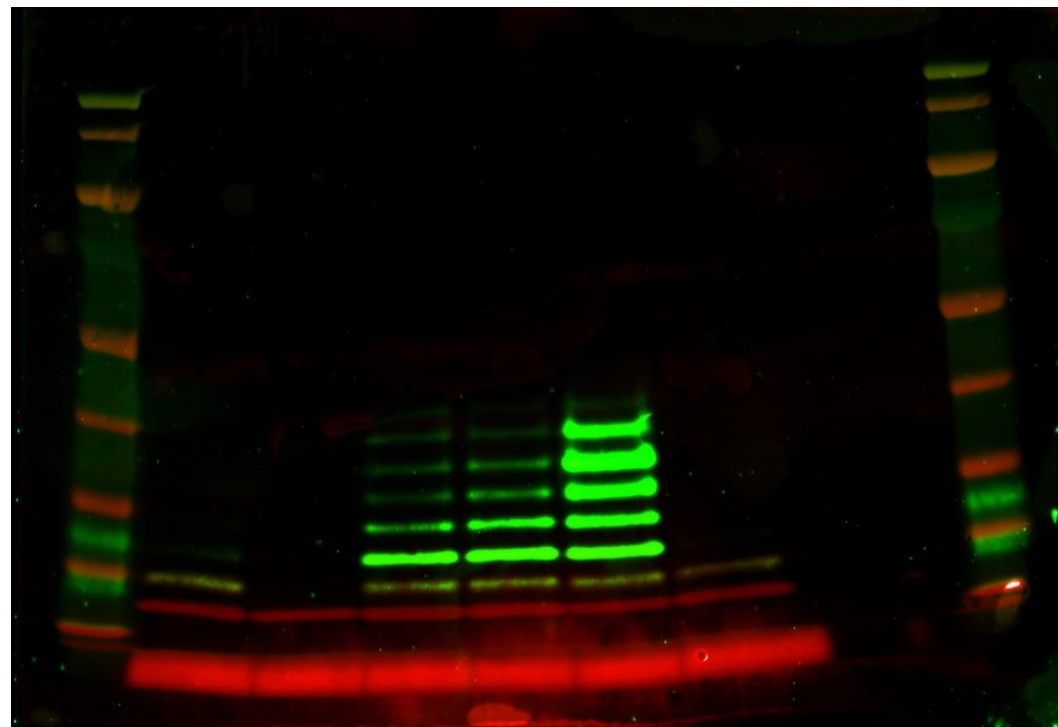

pgl1.C8  
plasmid only  
pglΔpglB  
pgl2.F6  
pgl1.C7  
pgl1.C8

Figure S7

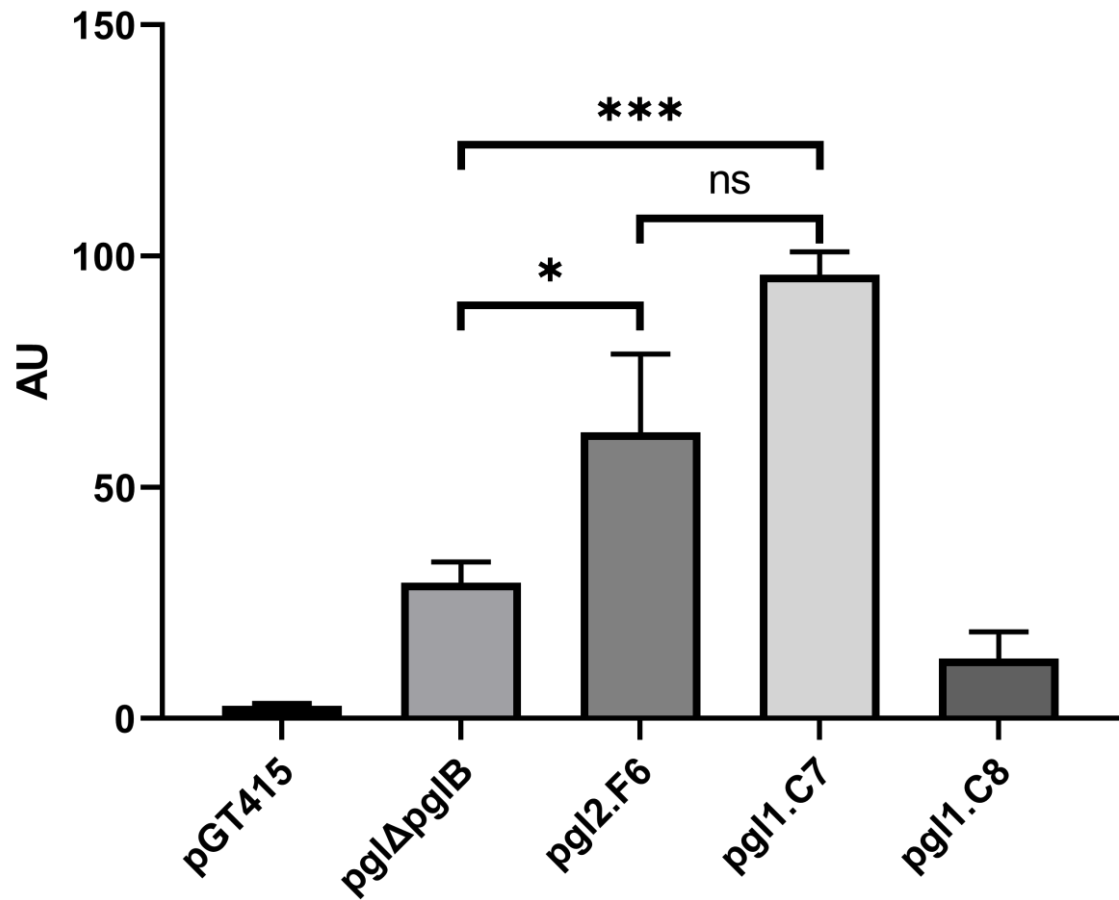

Supplement: supfiguresfinal_cwac082.pdf [file supfiguresfinal_cwac082.pdf]
